# Supplementary material for: HER2 and HLA-A*02 dual CAR-T cells utilize LOH in a NOT logic gate to address on-target off-tumor toxicity
Source: PubMed Central journal article supplement — J Immunother Cancer. 2023 Dec 13;11(12):e007426. doi: 10.1136/jitc-2023-007426 (PMC10729064; doi:10.1136/jitc-2023-007426), 2023-12-13
Supplement: jitc-2023-007426supp002.pdf [file jitc-2023-007426supp002.pdf]

Supplemental Table S1. List of reagents

| REAGENT or RESOURCE                                                      | SOURCE         | IDENTIFIER   | Clone/variant | Dilution/conc.        |
|--------------------------------------------------------------------------|----------------|--------------|---------------|-----------------------|
| <b>Cell Lines</b>                                                        |                |              |               |                       |
| NCI-H1650 bronchoalveolar adenocarcinoma                                 | ATCC           | CRL-5883     |               |                       |
| NCI-H1703 squamous cell lung carcinoma                                   | ATCC           | CRL-5889     |               |                       |
| A-431 Skin Epidermoid carcinoma                                          | ATCC           |              |               |                       |
| A549 lung adenocarcinoma                                                 | ATCC           |              |               |                       |
| FaDu Pharynx Squamous cell carcinoma                                     | ATCC           |              |               |                       |
| MCF7 Mammary Gland-Breast Adenocarcinoma                                 | ATCC           |              |               |                       |
| MDA-MB-231 Mammary Gland-Breast Adenocarcinoma                           | ATCC           |              |               |                       |
| MRC-5 Lung Fibroblast                                                    | ATCC           |              |               |                       |
| NCI-H1355 lung adenocarcinoma                                            | ATCC           |              |               |                       |
| NCI-H1792 lung adenocarcinoma                                            | ATCC           |              |               |                       |
| NCI-H1975 lung adenocarcinoma                                            | ATCC           |              |               |                       |
| NCI-H292 pulmonary mucoepidermoid carcinoma                              | ATCC           |              |               |                       |
| NCI-H441 papillary lung adenocarcinoma                                   | ATCC           |              |               |                       |
| NCI-H460 large cell lung carcinoma                                       | ATCC           |              |               |                       |
| NCI-H522 lung adenocarcinoma                                             | ATCC           |              |               |                       |
| NCI-H661 large cell lung carcinoma                                       | ATCC           |              |               |                       |
| SK-OV-3 Ovary Adenocarcinoma                                             | ATCC           |              |               |                       |
| U-87 MG Brain Glioblastoma                                               | ATCC           |              |               |                       |
| <b>Cell culture</b>                                                      |                |              |               |                       |
| RPMI 1640 (with 2mM L-Glutamine)                                         | Sartorius      | 01-100-1A    |               |                       |
| Fetal Bovine Serum, USA origin, Heat Inactivated                         | Sigma-Aldrich  | F4135        |               | 10%                   |
| Sodium pyruvate solution, 11mg/ml (100mM)                                | Sartorius      | 03-042-1B    |               | 1mM                   |
| Penicillin-Streptomycin (10000 U/ml, 10mg/ml)                            | Sigma-Aldrich  | P4333-100ML  |               | 100U/ml, 0.1mg/ml     |
| PBS (Dulbecco's Phosphate Buffered Saline Without Calcium and Magnesium) | Sartorius      | 02-023-1A    |               |                       |
| Trypsin-EDTA                                                             | Sartorius      | 03-050-1B    |               | For culture           |
| Tryple Express Enzyme 1x w/ Phenol Red                                   | Thermo Fisher  | 12605010     |               | For functional assays |
| Mycoalert detection kit                                                  | Lonza          | LNV-LT07-418 |               |                       |
| <b>Cell line engineering</b>                                             |                |              |               |                       |
| Firefly Luciferase Lentivirus (EF1 $\alpha$ , G418)                      | BPS Bioscience | 79692-G      |               | MOI = 1               |
| NuLight Green Lentivirus (EF1 $\alpha$ , Puro)                           | Sartorius      | 4624         | Nuc-GFP       | MOI = 3               |

|                                                              |                                                         |                                    |            |                      |
|--------------------------------------------------------------|---------------------------------------------------------|------------------------------------|------------|----------------------|
| NuLight Red Lentivirus (EF1 $\alpha$ , Puro)                 | Sartorius                                               | 4625                               | Nuc-mKate2 | MOI = 3              |
| hCD19 lentivirus (EF1 $\alpha$ , Blasticidin)                | Vector Builder                                          | LVM(VB900133-6392gkb)-K1           |            | MOI = 10             |
| G418                                                         | Sigma-Aldrich                                           | G8168-10ml                         |            | 200-800 $\mu$ g/ml   |
| Puromycin                                                    | Sigma-Aldrich                                           | P9620-10ML                         |            | 0.5-2 $\mu$ g/ml     |
| Blasticidin S ready made solution 10mg                       | Sigma-Aldrich                                           | SBR00022-1ml 10                    |            | 10 $\mu$ g/ml        |
| Lipofectamine CRISPRMAX Reagent                              | Thermo Fisher                                           | CMAX00003                          |            |                      |
| TrueCut Cas9 Protein v2 (100 $\mu$ g)                        | Thermo Fisher                                           | A36498                             |            | 0.1 $\mu$ g/ $\mu$ l |
| TrueGuide custom sgRNA HLA2 ACCCTCGTCCTGCTACTCTC FAM SEQ.GGG | Thermo Fisher                                           | A35514                             |            | 0.4 $\mu$ g/ $\mu$ l |
| TrueGuide Synthetic sgRNA (ID# CRISPR1097726_SGM; HLA-A)     | Thermo Fisher                                           | A35533                             |            | 0.4 $\mu$ g/ $\mu$ l |
| HLA-A seq primer FW: GAGAAGCAAGGGGCCCTC                      | Metabion                                                |                                    |            |                      |
| HLA-A seq primer Rev: CTGCTCTATCCACGGCGC                     | Metabion                                                |                                    |            |                      |
| Modified sgRNA Length 17-23 ERBB2 TCATCGCTCACAACCAAGTG       | Syntego                                                 | 003-1C0-000-000                    |            | 0.4 $\mu$ g/ $\mu$ l |
| ECM 830 Electroporation System, with Safety Dome             | BTX                                                     | 45-2052                            |            |                      |
| NEPA Electroporation Cuvettes 1mm gap, 50 pcs/pack           | NepaGene                                                | EC-002                             |            |                      |
| NCI-H1650-Luc                                                | This manuscript (ffLuc lentiviral transduction)         | H1650 (A2+HER2+) Luc               |            |                      |
| NCI-H1650-Luc A2KO (Clone 2) HLA-A*02 neg                    | This manuscript (CRISPR KO)                             | H1650 (A2-HER2+) Luc               |            |                      |
| NCI-H1650-Luc-nGFP                                           | This manuscript (NuLight Green lentiviral transduction) | H1650 (A2+HER2+) Luc-GFP "T2g"     |            |                      |
| NCI-H1650-Luc-nRFP                                           | This manuscript (NuLight Red lentiviral transduction)   | H1650 (A2+HER2+) Luc-RFP "T2"      |            |                      |
| NCI-H1650-Luc A2KO-nGFP                                      | This manuscript (NuLight Green lentiviral transduction) | H1650 (A2-HER2+) Luc-GFP "T1"      |            |                      |
| NCI-H1650-Luc A2KO-nRFP                                      | This manuscript (NuLight Red lentiviral transduction)   | H1650 (A2-HER2+) Luc-RFP "T1r"     |            |                      |
| NCI-H1650-Luc-nGFP HER2 KO                                   | This manuscript (CRISPR KO)                             | H1650 (A2+HER2-) Luc-GFP "T3g"     |            |                      |
| NCI-H1650-Luc-nRFP HER2 KO                                   | This manuscript (CRISPR KO)                             | H1650 (A2+HER2-) Luc-RFP "T3"      |            |                      |
| NCI-H1650-Luc-nGFP A2 KO +HER2 KO                            | This manuscript (CRISPR KO)                             | H1650 (A2-HER2-) Luc-GFP "T4"      |            |                      |
| NCI-H1650-Luc-nGFP-CD19                                      | This manuscript (CD19 lentiviral transduction)          | H1650 (A2+HER2+CD19+) Luc-GFP "T7" |            |                      |
| NCI-H1703-Luc                                                | This manuscript (ffLuc lentiviral transduction)         | H1703 (A2+) Luc                    |            |                      |
| NCI-H1703-Luc A2KO (Clone 1) HLA-A*02 neg                    | This manuscript (CRISPR KO)                             |                                    |            |                      |
| NCI-H1703-Luc A2KO (Clone 2) HLA-A*02 neg                    | This manuscript (CRISPR KO)                             | H1703 (A2-) Luc                    |            |                      |

|                                                                                                                 |                                                          |                          |              |                 |
|-----------------------------------------------------------------------------------------------------------------|----------------------------------------------------------|--------------------------|--------------|-----------------|
| NCI-H1703-Luc-nRFP                                                                                              | This manuscript (Nuclight Red lentiviral transduction)   | H1703 (A2+) Luc-RFP "T6" |              |                 |
| NCI-H1703-Luc A2KO (Clone 2)-nGFP                                                                               | This manuscript (Nuclight Green lentiviral transduction) | H1703 (A2-) Luc-GFP "T5" |              |                 |
|                                                                                                                 |                                                          |                          |              |                 |
| <b>Flow cytometry (where given two concentrations, the higher one colored blue was used for quantification)</b> |                                                          |                          |              |                 |
| Anti-DYKDDDDK (Flag) APC                                                                                        | Miltenyi Biotec                                          | 130-119-584              | REA216       | 1:50, 1:25      |
| Anti-cMyc FITC                                                                                                  | Miltenyi Biotec                                          | 130-116-485              | SH1-26E7.1.3 | 1:50, 1:25      |
| HLA-A2 Tetramer PE (NY-ESO-1 peptide)                                                                           | MBL International                                        | TB-M105-1                | SLLMWITQV    | 1:10, 1:5       |
| Anti-Trastuzumab (naked IgG1)                                                                                   | Absolute antibodies                                      | Ab00618-10.0             | scFv69       | 1:25            |
| Anti-human-IgG1 APC                                                                                             | BioLegend                                                | 406609                   | QA19A42      | 1:20            |
| Anti-Trastuzumab APC                                                                                            | Absolute antibodies                                      | Ab00618-10.0             | scFv69       | 1:10            |
| Anti-TNG3.2 (naked IgG1)                                                                                        | This manuscript (manufactured by Accurus bioscience)     | NA                       | R2 S2        | 10ug/ml         |
| Anti-Her2 PE                                                                                                    | Miltenyi Biotec                                          | 130-124-466              | REA1232      | 1:5             |
| Anti-EGFR PE                                                                                                    | R&D Systems                                              | FAB9577P-100             | Cetuximab    | 1:5             |
| Anti-HLA-A2 APC                                                                                                 | Thermo Fisher                                            | 17-9876-42               | BB7.2        | 1:20, 1:10      |
| Anti-Trastuzumab APC                                                                                            | Absolute antibodies                                      | Ab00618-10.0             | scFv69       | 1:10            |
| Anti-HLA-A2 APC                                                                                                 | Thermo Fisher                                            | 17-9876-42               | BB7.2        | 1:20            |
| Quantum FITC-5 MESF (Premix)                                                                                    | Bangs laboratories                                       | 555p                     |              |                 |
| Quantum R-PE MESF                                                                                               | Bangs laboratories                                       | 827                      |              |                 |
| Quantum APC MESF                                                                                                | Bangs laboratories                                       | 823                      |              |                 |
| Quantum Simply Cellular anti-Mouse IgG                                                                          | Bangs laboratories                                       | 815                      |              |                 |
| Quantum Simply Cellular anti-Human IgG                                                                          | Bangs laboratories                                       | 816                      |              |                 |
| PBS (Dulbecco's Phosphate Buffered Saline Without Calcium and Magnesium)                                        | Sartorius                                                | 02-023-1A                |              |                 |
| Fetal Bovine Serum, USA origin, Heat Inactivated                                                                | Sigma-Aldrich                                            | F4135                    |              | 2%              |
| DAPI ready made solution                                                                                        | Sigma-Aldrich                                            | MBD0015-1                |              | 1:2000          |
| Attune® NxT Acoustic Focusing Cytometer, blue/red/violet/yellow                                                 | Thermo Fisher                                            | A24858                   |              |                 |
| BD Celesta Flow Cytometer, blue/red/violet                                                                      | BD Biosciences                                           | BD FACSCelesta           |              |                 |
| FlowJo v10.8.1                                                                                                  | FlowJo, LLC                                              | N/A                      |              |                 |
| QUICKCAL V. 3.0                                                                                                 | Bangs Laboratories                                       | N/A                      |              |                 |
|                                                                                                                 |                                                          |                          |              |                 |
| <b>CAR-T</b>                                                                                                    |                                                          |                          |              |                 |
| Whole Blood Samples of Healthy donors                                                                           | Sheba Blood Bank, Ramat gan, Israel                      | Leukocytes for research  |              | D26, 28, 30     |
| Human Leukopak                                                                                                  | Hemacare corporation, Northridge, CA                     | PB001F-1                 |              | D144, 466, 9587 |

|                                                                    |                                                 |                                                 |                    |                      |
|--------------------------------------------------------------------|-------------------------------------------------|-------------------------------------------------|--------------------|----------------------|
| PBMC                                                               | Hemacare corporation, Northridge, CA            | PB009C-3                                        |                    |                      |
| Ficoll Paque Plus                                                  | Sigma-Aldrich                                   | GE17-1440-02                                    |                    |                      |
| LymphoOne T-cell expansion Xeno-Free medium                        | Takara Bio                                      | WK552S                                          |                    |                      |
| TransAct                                                           | Miltenyi Biotec                                 | 130-111-160                                     |                    | 1:100                |
| Human IL-2 IS, premium grade                                       | Miltenyi Biotec                                 | 130-097-746                                     |                    | 100 U/ml             |
| Custom made lentivirus (EF1 $\alpha$ )                             | Alstem                                          | CS-LV02X                                        |                    |                      |
| Custom made lentivirus (EF1 $\alpha$ )                             | Vector Builder                                  | Lentivirus packaging, custom made, medium scale |                    |                      |
| Male human AB serum heat inactivated                               | Access Biologicals                              | AC-001-1B                                       |                    | 1%                   |
| CryoStor CS10                                                      | Sigma-Aldrich                                   | C2874                                           |                    |                      |
| MACS BSA Stock solution                                            | Miltenyi Biotec                                 | 130-091-376                                     |                    | 0.5%                 |
| HLA-A2 Tetramer PE (NY-ESO-1 peptide)                              | MBL International                               | TB-M105-1                                       | SLLMWITQV          | 1:10                 |
| Anti-PE MicroBeads                                                 | Miltenyi Biotec                                 | 130-105-639                                     |                    |                      |
| G-Rex 24 well plate                                                | Wilson Wolf                                     | 80192M                                          |                    |                      |
| G-Rex 6 well plate                                                 | Wilson Wolf                                     | 80240M                                          |                    |                      |
| LS columns                                                         | Miltenyi Biotec                                 | 130-042-401                                     |                    |                      |
| MS columns                                                         | Miltenyi Biotec                                 | 130-042-201                                     |                    |                      |
| TrueCut Cas9 Protein v2 (100 $\mu$ g)                              | Thermo Fisher                                   | A36498                                          |                    | 0.1 $\mu$ g/ $\mu$ l |
| TrueGuide custom sgRNA HLA-A2 probe#150<br>TACCACCAGTACGCCTACGA    | Thermo Fisher                                   | A35514 "sgRNA #150"                             |                    | 0.4 $\mu$ g/ $\mu$ l |
| Modified sgRNA Length 17-23<br>TCR Control<br>AGAGTCTCTCAGCTGGTACA | Syntego                                         | 003-1C0-000-000                                 |                    | 0.4 $\mu$ g/ $\mu$ l |
| Anti-HLA-A2 APC                                                    | Thermo Fisher                                   | 17-9876-42                                      | BB7.2              | 1:20                 |
| Anti-APC MicroBeads                                                | Miltenyi Biotec                                 | 130-090-855                                     |                    |                      |
| Anti-cMyc FITC                                                     | Miltenyi Biotec                                 | 130-116-485                                     | SH1-26E7.1.3       | 1:25                 |
| Anti-FITC MicroBeads                                               | Miltenyi Biotec                                 | 130-048-701                                     |                    |                      |
| Neon Transfection System                                           | Thermo Fisher                                   | MPK5000                                         |                    |                      |
| Neon Transfection System 100 $\mu$ L Kit                           | Thermo Fisher                                   | MPK10025                                        |                    |                      |
| <b>CAR constructs</b>                                              |                                                 |                                                 |                    |                      |
| VR33                                                               | This manuscript (synthesized by Alstem)         | HER2 aCAR (Trastuzumab scFv)                    |                    | MOI = 10             |
| VR49                                                               | This manuscript (synthesized by Vector Builder) | BB7.2 KIR2DL1 dual CAR                          |                    | MOI = 20             |
| VR51                                                               | This manuscript (synthesized by Vector Builder) | BB7.2 LIR1 dual CAR                             | PD1 HTM, T2A       | MOI = 20             |
| VR54                                                               | This manuscript (synthesized by Vector Builder) | BB7.2 CD33 dual CAR                             |                    | MOI = 20             |
| VR354                                                              | This manuscript (synthesized by Vector Builder) | BB7.2 LIR1 dual CAR                             | LIR1 HTM (52), T2A | MOI = 20             |
| VR362                                                              | This manuscript (synthesized by Vector Builder) | BB7.2 PD1 dual CAR                              |                    | MOI = 20             |
| VR363                                                              | This manuscript (synthesized by Vector Builder) | BB7.2 PD1x2 dual CAR                            |                    | MOI = 20             |

|                                                                                                 |                                                 |                                     |                              |          |
|-------------------------------------------------------------------------------------------------|-------------------------------------------------|-------------------------------------|------------------------------|----------|
| VR428                                                                                           | This manuscript (synthesized by Vector Builder) | HzBB7.2.1 LIR1 dual CAR             | LIR1 HTM (52), IRES          | MOI = 20 |
| VR447                                                                                           | This manuscript (synthesized by Vector Builder) | TNF3.2 LIR1 dual CAR                | LIR1 HTM (30), IRES          | MOI = 20 |
| VR492                                                                                           | This manuscript (synthesized by Vector Builder) | HzBB7.2.2 iMut dual CAR             | LIR1 HTM (52), T2A           | MOI = 20 |
| VR495                                                                                           | This manuscript (synthesized by Vector Builder) | Non-binder LIR1 dual CAR            | LIR1 HTM (52), T2A           | MOI = 20 |
| Dual CAR HTM variants                                                                           | This manuscript (synthesized by Vector Builder) | BB7.2 LIR1 dual CAR (several HTM)   | LIR1 D3-4, D4, CD8, CD28     | MOI = 20 |
| Dual CAR short LIR1 hinge length variants                                                       | This manuscript (synthesized by Vector Builder) | HzBB7.2.1 LIR1 dual CARs (LIR1 HTM) | 64, 52, 44, 36, 30, 26, 20aa | MOI = 20 |
| Dual CAR iCAR scFv variant HzBB7.2.2                                                            | This manuscript (synthesized by Vector Builder) | HzBB7.2.2 LIR1 dual CARs            | LIR1 HTM (52), T2A or IRES   | MOI = 20 |
| Dual CAR iCAR scFv variant TNF3.3                                                               | This manuscript (synthesized by Vector Builder) | TNF3.3 LIR1 dual CAR                | LIR1 HTM (26), T2A or IRES   | MOI = 20 |
| CD19 CAR                                                                                        | This manuscript (synthesized by Vector Builder) | CD19 aCAR (FMC63 scFv)              |                              | MOI = 10 |
| <b>Luciferase killing assay</b>                                                                 |                                                 |                                     |                              |          |
| Bio-Glo Luciferase Assay system                                                                 | Promega                                         | G7940                               |                              |          |
| Corning 96 well solid white polystyrene plates                                                  | Corning                                         | CLS3917                             |                              |          |
| Varioskan LUX multimode microplate reader                                                       | Thermo Fisher                                   | VL0L00D0                            |                              |          |
| GraphPad Prism v9                                                                               | GraphPad Software Inc.                          | N/A                                 |                              |          |
| <b>IFN<math>\gamma</math> secretion assay</b>                                                   |                                                 |                                     |                              |          |
| Human IFN $\gamma$ CBA Flex Set E7,100T                                                         | BD Biosciences                                  | BD558269                            |                              |          |
| 96 Well Plate, V bottom, Non-Binding                                                            | Greiner Bio-One                                 | 651901                              |                              |          |
| <b>IncuCyte 2D and 3D assays</b>                                                                |                                                 |                                     |                              |          |
| IncuCyte <sup>®</sup> S3 Live-Cell Analysis Instrument                                          | Sartorius                                       | 4647                                |                              |          |
| Nunc <sup>™</sup> MicroWell <sup>™</sup> 96-Well, Nunclon Delta-Treated, Flat-Bottom Microplate | Thermo Fisher                                   | 167008                              |                              | For 2D   |
| Corning Costar Ultra-Low Attachment 96 well plate, Round bottom, Clear                          | Corning                                         | CLS7007                             |                              | For 3D   |
| IncuCyte Annexin-V Red Reagent                                                                  | Sartorius                                       | 4641                                |                              |          |
| IncuCyte 2019B rev2                                                                             | Essen Bioscience                                | N/A                                 |                              |          |
| <b>Reversibility and Repeated Antigen Challenge</b>                                             |                                                 |                                     |                              |          |
| EasySep Human PE Position Selection Kit II                                                      | StemCell                                        | 17664                               |                              |          |
| Anti-hCD324 (E-Cadherin) PE                                                                     | Miltenyi Biotec                                 | 130-111-839                         | 8C11                         | 1:50     |
| Anti-human P-Cadherin PE                                                                        | R&D Systems                                     | FAB861P                             | 104805                       | 1:5      |

|                                                                          |                        |                                          |     |       |
|--------------------------------------------------------------------------|------------------------|------------------------------------------|-----|-------|
| PBS (Dulbecco's Phosphate Buffered Saline Without Calcium and Magnesium) | Sartorius              | 02-023-1A                                |     |       |
| MACS BSA Stock solution                                                  | Miltenyi Biotec        | 130-091-376                              |     | 0.5%  |
| EDTA Disodium Solution, 0.5M, pH=8                                       | Biological Industries  | 01-862-1B                                |     | 10 mM |
|                                                                          |                        |                                          |     |       |
| <b>Mouse xenograft studies</b>                                           |                        |                                          |     |       |
| Mice: NSG (NOD.Cg-Prkdcscid Il2rgtm1Wjl/SzJ)                             | The Jackson Laboratory | Cat# JAX:005557;<br>RRID:IMSR_JAX:005557 |     |       |
| IFNg was IFN gamma Human ELISA Kit, High Sensitivity (in vivo)           | Thermo Fisher          | BMS228HS                                 |     |       |
| Human AB Serum                                                           | MP Biomedical          | 2938249                                  |     | 1:20  |
| Mouse Serum                                                              | Thermo Fisher          | 24-5544-94                               |     | 1:20  |
| Rabbit Serum                                                             | MilliporeSigma         | NS01L1ML                                 |     | 1:20  |
| Dulbecco's Phosphate-Buffered Saline, no Ca2+ or Mg2+                    | Thermo Fisher          | 14287080                                 |     |       |
| TruStain Monocyte Blocker                                                | BioLegend              | 426103                                   |     | 1:20  |
| Cell Stain Buffer (with BSA) (CSB)                                       | BD Biosciences         | 554657                                   |     |       |
| ACK Lysing Buffer                                                        | Lonza                  | 10548E                                   |     |       |
| Anti-hCD3 APC-Cy7                                                        | BioLegend              | 344818                                   | SK7 | 1:80  |
| TruStain FcX PLUS (anti-mouse CD16/32) Antibody                          | BioLegend              | 156604                                   |     | 1:200 |
| CountBright Absolute Counting Beads                                      | Thermo Fisher          | C36950                                   |     |       |

**Supplemental Table S2.** Determination of A2 and HER2 expression in cancer cell lines

| Histology                           | Cell Line                          | HLA-A Alleles <sup>1</sup> |        | Receptors per cell (ABC) <sup>2</sup> |           |       | CCLE RNAseq (TPM) |       |       |
|-------------------------------------|------------------------------------|----------------------------|--------|---------------------------------------|-----------|-------|-------------------|-------|-------|
|                                     |                                    | I                          | II     | Her2                                  | HLA-A2    | Ratio | Her2              | HLA-A | Ratio |
| Skin Epidermoid carcinoma           | A-431                              | 03:01                      | 03:01  | 2,818                                 | ND        |       | NA                | NA    | NA    |
| lung adenocarcinoma                 | A549                               | 25:01                      | 30:01  | ND                                    | ND        |       | 17                | 57    | 3.4   |
| Pharynx Squamous cell carcinoma     | FaDu                               | 01:01                      | 01:01  | 39,783                                | ND        |       | 56                | 193   | 3.4   |
| Pharynx Squamous cell carcinoma     | FaDu-A2+ (Jet Prime, 1B10 clone)   | 01:01                      | 01:01  | ND                                    | 1,349,780 |       | 56                | 193   | 3.4   |
| Pharynx Squamous cell carcinoma     | FaDu-A2+ (Lipofectamine FAL clone) | 01:01                      | 01:01  | ND                                    | 2,177,934 |       | 56                | 193   | 3.4   |
| Mammary Gland-Breast Adenocarcinoma | MCF7                               | 02:01                      | 02:01  | 56,182                                | 126,085   | 2.2   | 46                | 39    | 0.8   |
| Mammary Gland-Breast Adenocarcinoma | MDA-MB-231                         | 02:17                      | 02:01  | 16,944                                | 2,468,107 | 145.7 | 24                | 840   | 35.0  |
| Lung Fibroblast                     | MRC-5                              | 2:01                       | 29:02  | 10,569                                | 385,253   | 36.5  | NA                | NA    | NA    |
| lung adenocarcinoma                 | NCI-H1355                          | 02:01                      | 02:01  | 21,817                                | 210,501   | 9.6   | 41                | 135   | 3.3   |
| lung adenocarcinoma                 | NCI-H1355-Luc                      | 02:01                      | 02:01  | 10,608                                | 405,293   | 38.2  | 41                | 135   | 3.3   |
| lung adenocarcinoma                 | NCI-H1355-Luc A2KO (Clone C9)      | 02:01                      | 02:01  | 10,139                                | ND        |       | 41                | 135   | 3.3   |
| bronchoalveolar adenocarcinoma      | NCI-H1650                          | 02:01                      | 02:01  | 55,207                                | 813,485   | 14.7  | 79                | 128   | 1.6   |
| bronchoalveolar adenocarcinoma      | NCI-H1650-Luc                      | 02:01                      | 02:01  | 20,475                                | 1,247,812 | 60.9  | 79                | 128   | 1.6   |
| bronchoalveolar adenocarcinoma      | NCI-H1650-Luc A2KO (Clone 2)       | 02:01                      | 02:01  | 21,122                                | ND        |       | 79                | 128   | 1.6   |
| bronchoalveolar adenocarcinoma      | NCI-H1650-Luc A2KO (Clone 7)       | 02:01                      | 02:01  | 35,472                                | ND        |       | 79                | 128   | 1.6   |
| squamous cell lung carcinoma        | NCI-H1703                          | 01:01                      | 02:01  | 21,322                                | 878,876   | 41.2  | 33                | 551   | 16.7  |
| squamous cell lung carcinoma        | NCI-H1703-Luc                      | 01:01                      | 02:01  | 24,739                                | 1,684,284 | 68.1  | 33                | 551   | 16.7  |
| squamous cell lung carcinoma        | NCI-H1703-Luc A2KO (Clone 2)       | 01:01                      | 02:01  | 27,286                                | ND        |       | 33                | 551   | 16.7  |
| lung adenocarcinoma                 | NCI-H1792                          | 26:08'                     | 02:01  | 18,606                                | 483,418   | 26.0  | 22                | 283   | 12.9  |
| lung adenocarcinoma                 | NCI-H1792-Luc                      | 26:08'                     | 02:01  | 9,264                                 | 726,720   | 78.4  | 22                | 283   | 12.9  |
| lung adenocarcinoma                 | NCI-H1792-Luc A2KO (Clone F6)      | 26:08'                     | 02:01  | 7,925                                 | ND        |       | 22                | 283   | 12.9  |
| lung adenocarcinoma                 | NCI-H1975                          | 01:01                      | 01:01  | 49,165                                | ND        |       | 36                | 483   | 13.4  |
| lung adenocarcinoma                 | NCI-H1975-Luc                      | 01:01                      | 01:01  | 26,792                                | ND        |       | 36                | 483   | 13.4  |
| pulmonary mucopidermoid carcinoma   | NCI-H292-Luc                       | 68:02                      | 74:01  | 14,623                                | ND        |       | 30                | 54    | 1.8   |
| papillary lung adenocarcinoma       | NCI-H441                           | 03:01                      | 02:01' | 39,368                                | 121,410   | 3.1   | 74                | 846   | 11.4  |
| papillary lung adenocarcinoma       | NCI-H441-Luc A2KO (Clone C7)       | 03:01                      | 02:01' | 53,857                                | ND        |       | 74                | 846   | 11.4  |
| large cell lung carcinoma           | NCI-H460                           | 68:01'                     | 24:02  | 19,642                                | ND        |       | 13                | 170   | 13.1  |
| lung adenocarcinoma                 | NCI-H522                           | 02:01                      | 24:18' | 68,995                                | 90,674    | 1.3   | 150               | 74    | 0.5   |
| large cell lung carcinoma           | NCI-H661                           | 02:01'                     | 24:02' | 67,437                                | 25,376    | 0.4   | 62                | 2     | 0.0   |
| Ovary Adenocarcinoma                | SK-OV-3                            | 68:01                      | 03:01  | ND                                    | ND        |       | 2,123             | 1,350 | 0.6   |
| Brain Glioblastoma                  | U-87 MG                            | 02:01                      | 02:01  | 0                                     | 602,864   |       | 3                 | 589   | 196.3 |
|                                     |                                    |                            |        |                                       |           |       |                   |       |       |
|                                     |                                    |                            |        |                                       |           |       |                   |       |       |
| <b>Column Statistics</b>            |                                    |                            |        |                                       |           |       |                   |       |       |
| Median                              |                                    |                            |        | 22,844                                | 494,059   | 31.2  | 39                | 182   | 4.7   |
| 25% Quartile                        |                                    |                            |        | 14,514                                | 124,916   | 4.7   | 24                | 70    | 3.0   |
| 75% Quartile                        |                                    |                            |        | 41,490                                | 1,093,381 | 56.0  | 65                | 561   | 8.6   |
| Min                                 |                                    |                            |        | 0                                     | 25,376    | 0.4   | 3                 | 2     | 0.7   |
| Max                                 |                                    |                            |        | 68,995                                | 2,468,107 | 145.7 | 2,123             | 1,350 | 0.6   |
|                                     |                                    |                            |        |                                       |           |       |                   |       |       |
| Mean                                |                                    |                            |        | 29,658                                | 734,068   | 37.6  | 176               | 362   | 2.1   |
| Std Dev                             |                                    |                            |        | 21,508                                | 765,947   | 40.6  | 520               | 385   | NA    |

**Supplemental Table S2 Notes**

1. The HLA-A alleles in each cell line were obtained using the Tron Cell Lines Portal (<http://celllines.tron-mainz.de/>)[7]
2. The cell surface expression of HER2 and A2 were measured by qFACS in 2D cultures using anti HER2 and A2 allele specific monoclonal antibody BB7.2 as described in **Methods**.
